# Supplementary material for: Porous graphene-coated stainless-steel fiber for direct immersion solid-phase microextraction of polycyclic aromatic hydrocarbons
Source: Royal Society of Chemistry journal article supplement (doi:10.1039/c8ay02330a), 2018-12-03
Supplement: c8ay02330a1.pdf [file c8ay02330a1.pdf]

## Supplementary material for

# **Porous graphene-coated stainless-steel fiber for direct immersion solid-phase microextraction of polycyclic aromatic hydrocarbons**

Yanni Huang<sup>1</sup>, Jia Chen<sup>2,\*</sup>, Zhan Li<sup>2</sup>, Li Wang<sup>2</sup>, Ming Guan<sup>1</sup>, Hongdeng Qiu<sup>1,2,\*</sup>

<sup>1</sup> Laboratory on Pollution Monitoring and Control, College of Chemistry and Chemical Engineering, Xinjiang Normal University, Urumqi 830054, China

<sup>2</sup> CAS Key Laboratory of Chemistry of Northwestern Plant Resources and Key Laboratory for Natural Medicine of Gansu Province, Lanzhou Institute of Chemical Physics, Chinese Academy of Sciences, Lanzhou 730000, China

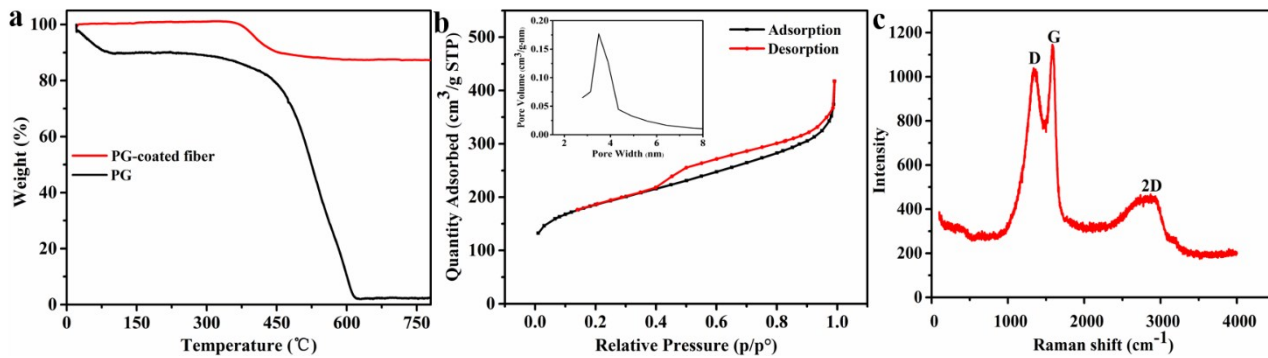

Fig. S1 (a) TGA curve of porous graphene and PG-coated fiber; (b) N<sub>2</sub> adsorption-desorption curves and (the inset) pore size distribution of the PG samples; (c) Raman spectra of PG.

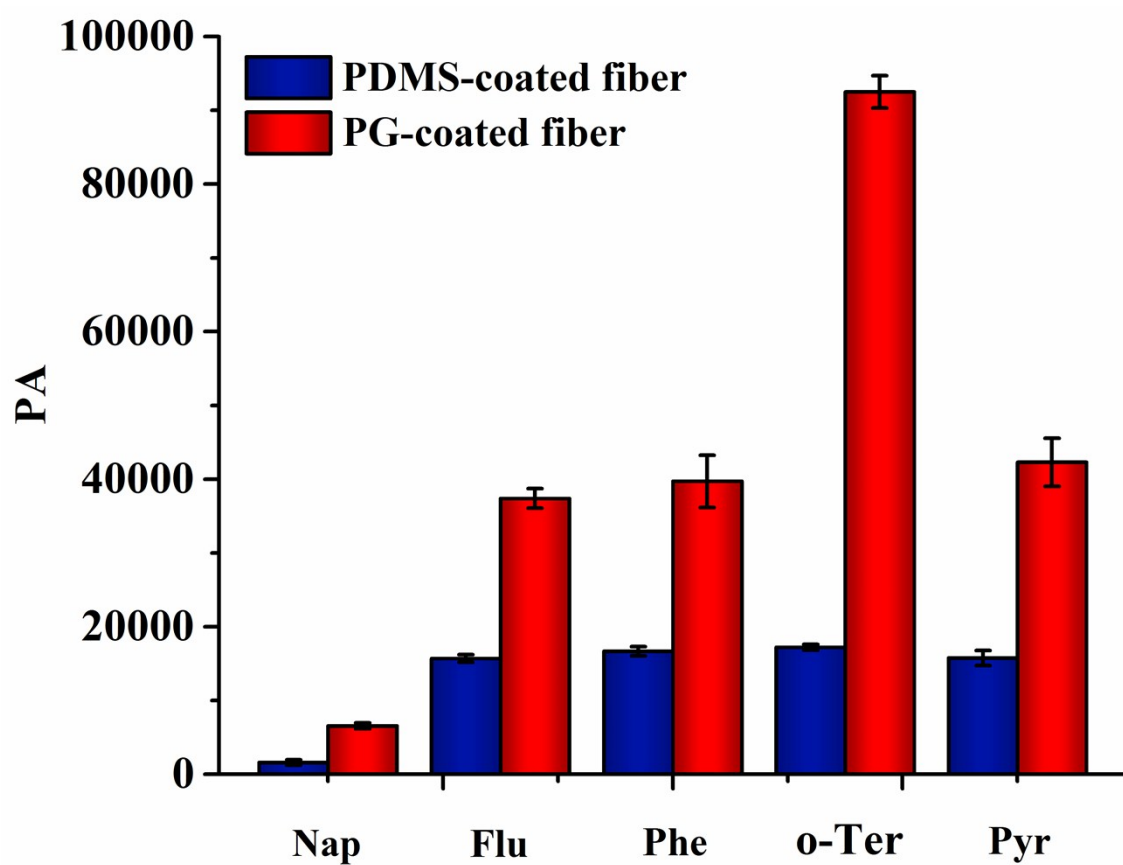

Fig. S2 Comparison of the extraction efficiency of PG-coated fiber with PDMS-coated fiber.

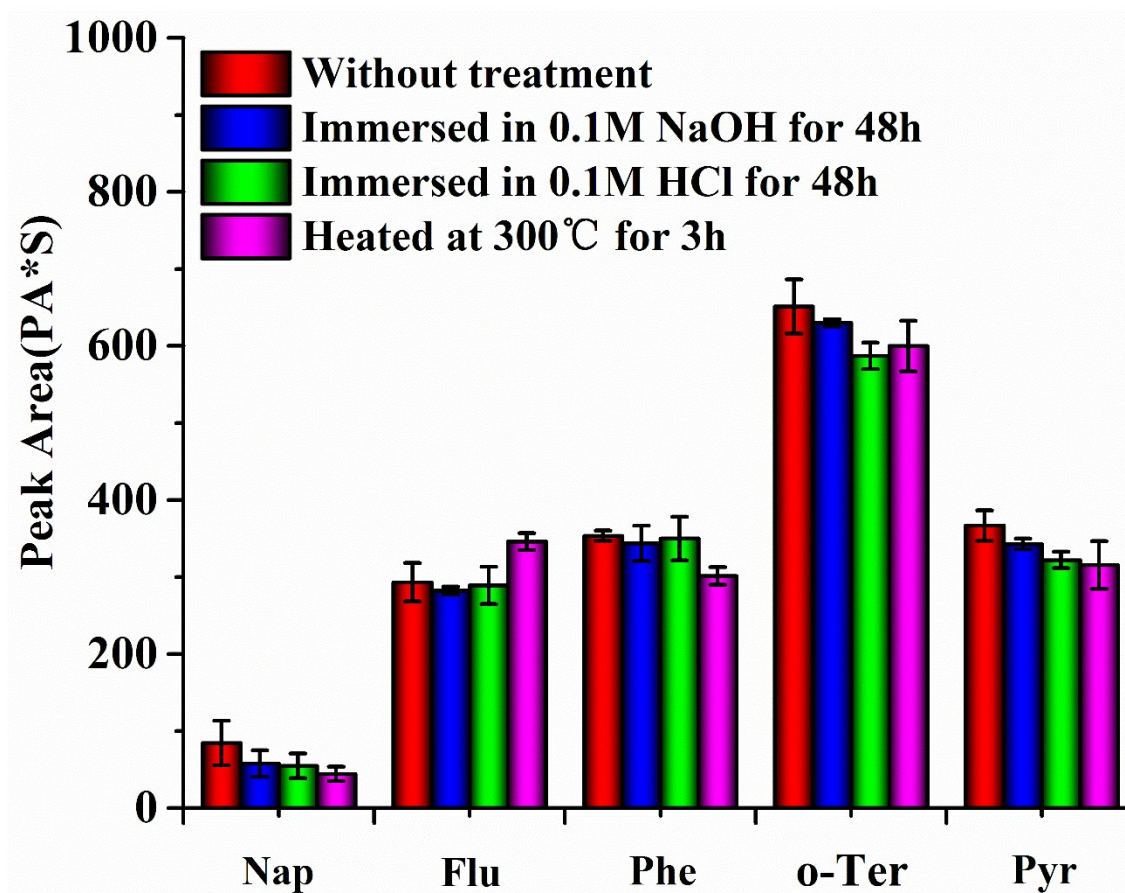

Fig. S3 Stability of PG-SPME fiber. Conditions: extraction time, 40 min; extraction temperature, 30 °C; content of NaCl, 20% (w/v); desorption temperature, 250 °C; desorption time, 7 min.

Table S1 Analytical data of the method with PG coated fiber.

| Compounds | Linear range<br>( $\mu\text{g L}^{-1}$ ) | $R^2$  | LOD<br>( $\text{ng L}^{-1}$ ) | RSD (%)         |                         |
|-----------|------------------------------------------|--------|-------------------------------|-----------------|-------------------------|
|           |                                          |        |                               | One fiber (n=5) | Fiber-to-fiber ( n = 3) |
| Nap       | 0.002-10                                 | 0.9991 | 2                             | 7.75            | 8.12                    |
| Flu       | 0.002-10                                 | 0.9940 | 1                             | 5.15            | 4.31                    |
| Phe       | 0.002-10                                 | 0.9971 | 1                             | 4.56            | 3.29                    |
| o-Ter     | 0.002-10                                 | 0.9953 | 1                             | 4.81            | 5.15                    |
| Pyr       | 0.002-10                                 | 0.9986 | 2                             | 3.93            | 4.52                    |

Table S2 Determination and recoveries of PAHs in real samples.

| Samples     | Analytes | Mean<br>( $\mu\text{g L}^{-1}$ ) | Spiked $0.1 \mu\text{g L}^{-1}$ |         | Spiked $1\mu\text{g L}^{-1}$ |         |
|-------------|----------|----------------------------------|---------------------------------|---------|------------------------------|---------|
|             |          |                                  | Recovery (%)                    | RSD (%) | Recovery (%)                 | RSD (%) |
| River water | Nap      | N.D.                             | 85.66                           | 8.27    | 97.37                        | 3.11    |
|             | Flu      | N.D.                             | 98.44                           | 5.55    | 92.19                        | 5.65    |
|             | Phe      | N.D.                             | 92.09                           | 9.61    | 99.01                        | 1.12    |
|             | o-Ter    | N.D.                             | 88.80                           | 2.92    | 94.42                        | 7.55    |
|             | Pyr      | N.D.                             | 98.62                           | 3.93    | 100.5                        | 4.75    |
| Pond water  | Nap      | N.D.                             | 64.83                           | 9.27    | 99.33                        | 14.1    |
|             | Flu      | N.D.                             | 76.16                           | 1.56    | 96.83                        | 3.80    |
|             | Phe      | N.D.                             | 83.68                           | 5.64    | 102.0                        | 0.62    |
|             | o-Ter    | 0.01                             | 95.22                           | 2.85    | 99.64                        | 1.55    |
|             | PYr      | 0.01                             | 83.84                           | 3.67    | 99.37                        | 0.43    |
|             | Pyr      | N.D.                             | 81.54                           | 3.19    | 92.46                        | 6.74    |

N.D., not detected.
